# Supplementary material
Source: PubMed Central journal article supplement (PMC6102998)

Figure S1

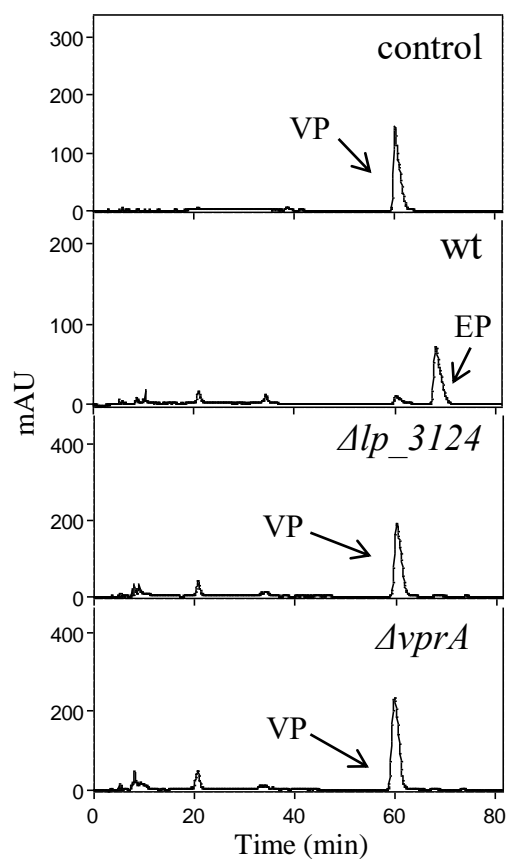

**FIG S1** Effect of disruption of *lp\_3124* (*vprR*), and *lp\_3125* (*vprA*) on vinylphenol reductase activity in *L. plantarum* WCFS1. HPLC chromatograms of *L. plantarum* cultures incubated in 1.5 mM 4-vinylphenol are shown for *L. plantarum* WCFS1 (wild type [wt]), *L. plantarum* WCFS1 (pUCE191-*vprR*) ( $\Delta lp\_3124$  mutant), and *L. plantarum* WCFS1 (pUCE191-*vprA*) ( $\Delta lp\_3125$  mutant). Results for uninoculated medium are also shown (control). The 4-vinylphenol (VP) and 4-ethylphenol (EP) detected are indicated. Chromatograms were recorded at 280 nm.

Figure S2

# A

VprA MTLAKHDSYDIVVVV **GTGAAC** TAAALEAAQH GASVLLLEKGRHTGGSSNYTEGLFAVDSYL  
DBVR -----

VprA QKAQNINVSATDVLKEEVDY SKYRADSRIWRRYLDDSANTVQWLKDQGEVEYEGVQAMGAG  
DBVR -----

VprA EATWHIYKGMQAVLHDALQPAQKLGVELLTSTTAITLHQATDGAITGVMIQSAATNET  
DBVR -----

VprA QVINTAAVILATGGYLNNPDMQKLTHYDTRRLIPVSSGKGTGDGLRLAWQAGAQQYGTG  
DBVR -----

VprA MAMLFGGYLKDPSEPSFKYMASQMETAAGQPLLWLNEHGERFVDEAVVYNFSYAGNALY  
DBVR -----

VprA TQNQVFSILDQGVINKMAQDGNFMGLGVYVRRGEKMTKLQAE----- IDAAVAA  
DBVR -----MVKAVAVVRGDSTVKGVVTFEQTSESEPTTIXYNIEG  
\* . \* \* \* : . \* . \* : .

VprA NKPFIFKANTIEALATKMHLFVDQVTHSIQTYNQYCDNGQDDDFGKNPEYLKVSQGPFY  
DBVR NDPNALRGFH----- IHT-----FGDNTNG--CTSAGPHF  
\* . \* : : . \* : \* \* \* . \* \* \* .

VprA -GFELNVGA-----FCTMGGLKVTTNN-----EVLDTTGQ-PIT---GLYAAGND  
DBVR NPF GKTHGAPT DENRHVGD LGNIKTDANGVAKGT IKDKLVKLI GXNSIIIGRTVVVHAGTD  
\* . \* \* . : \* : \* . \* \* : \* \* \*

VprA AAGLTGDYGP NMPGTCVGYAFYSGRNSGRHAAQYTHQQSIVSH  
DBVR DL **GKGGDAG** -S-----LQTGNAGGRPACGVIGLSA-----  
\* \* \* : : \* . \* \* \* . : .

# B

VprA -----  
HcrB MKFVGIVGTNAQHSYNRMLLEFMQRHFATQAEIEILELTDVPMFDESNDQTDSTIIQNFA

VprA -----  
HcrB TKIATADGVI IASPEHNH SVSALKSII EWLSFKIHP LDGQAVMIVGASYSVQSSRAQL

VprA -----  
HcrB HLRQILDAPGVNASVMPGSEFLLGRAQTA FDDQGNLKVQGTVDVFLDSCFAK FQKFATIVA

```

VprA -----
HcrB EMRAPEALSFAPGTYQVTATGHNGELPMRVTL SADRIENIEIDTSSETQGIADVAFERIP

VprA -----MTLAKHDS
HcrB KEIIAGQTLAVDAISGASITSHGVIDGVARAVKEAGANPDDLKRRATKQVAQPAVKEVT
      .*. :

VprA YDIVVV GTGAAG TAAALEAAQH GASVLLLEKGRHTGGSSNYTEGLFA-----
HcrB TDVVVV GAGGAG MTAAAKVLQAGHQAVVLEKFAVGGNTVRAGGPMNAADPDWQRQFAAL
      *:****:*.** :** :. * * ..:*** .**.: : * :

VprA -----VDSYLQKAQNINVS--ATDVLK-----
HcrB PGEKQTLKDLSE RDESTIAPEYRADFRK LKQIDAYLTANTNQKGLFDSTLLHRIQTYL
      :*:** * : : :*:

VprA ----EEVDYSKYRADSRIRWRYLDD SANTVQWLKDQGV EYEGVQAMGAGEATWHIYK-GM
HcrB GGQRDTLNGQEIHGQYDLVKELTDNALDSVKWLQSIGVKFDESQVTMPVGAIWRRGHKPM
      :. : :. :. * : :*:**:. **.: * . * * : *

VprA GQAVL--HDALQPQAQKLGVELLSTTAITLHQATDGAITGVMIQSAATNETQVINTAAV
HcrB GDLGFAYIKTLRAFVEQQGGTIMTE-TPVKELLVTDGQVRGVIATN-AAHEKIVHADAV
      * : : .*: :. : * :*. * :. .*** : ** : .*:*. : : : **

VprA ILATGGYLNPNPMMQKLTHYDTRR---LIPVSSGKGTGDGLRLAWQAGAQQYGTGMAMLF
HcrB ILASGGFAANTKMLQKYN TYWTAIDDDVKTTNSPAMTGDGIRLGT SVGAALVGMGFSQMM
      ***:*. : * .*:** . * * : ..* ****:*. .** * * : :

VprA GGYLKDPSEPSFKYMASQMETAGQQPLLWLNEHGERFVDEAVVYNFSYAGNALYTQNV
HcrB PV-----SDPETGELFSG LQ--VPPANFVMVNQQGRFVNEYGSRDEL--TQAAIDNGSL
      *.* : * :. : : :*:**:* : : * : : :

VprA FSILDQGVINKMAQDGNFMGLGVYVRRGEKMTKLQAEIDAAVAANKPFIKANTIEALAT
HcrB FYLIADDEIKKT-----AYNTTQAKIDQQVA--NGTLFRADTLTDLAQ
      * : : .*: * .. **:* ** : :*:*. : **

VprA KMHLPVDQVTHSIQTYNQYCDNGQDDDFGKNPEYLVKVSQGPFGFELNVGAFCTMGGLK
HcrB QIGMDPAALTKTIADYNRYVDAGEDPEFHKT-AFDLKVAVAPFYATPRKPATHHTMGGLK
      : : :*:** **:* * *:* * * : :** : ** . : :. *****

VprA VTTNNEVLDTTGQPITGLYAAGNDAAGLTGDTYGNMPGTCVGYAFYSGRNSGRHAAQYT
HcrB IDSDAHLVNTDGQVIDGLYAAGEVAGGIHAG---NRLGGNSLSDIFTFGRIAAAHAVAEH
      : : .**:* ** * *****: *.* :. : : *... * ** :. **.

VprA HQQSIVSH
HcrB -VDPVTA-
      : : :

```

**FIG S2** Comparison of amino acid sequences of *L. plantarum* WCFS1 VprA protein and vinylphenol reductase from *D. bruxellensis* (DBVR, I2JWC1) (A) or to *L. plantarum* WCFS1 hydroxycinnamate reductase (HcrB) (B). Multiple alignments were done using the programs ClustalOmega after retrieval of sequences from BLAST homology searches. Residues that are identical (\*), conserved (:), or semiconserved (.) in all sequences are indicated. Dashes indicated gaps introduced to maximize similarities. The Rossmann-fold GXGXXG motif is highlighted in green.

Figure S3

Applied Biosystems Voyager System 6214

Voyager Spec #1=>MC[BP = 311.7, 7387]

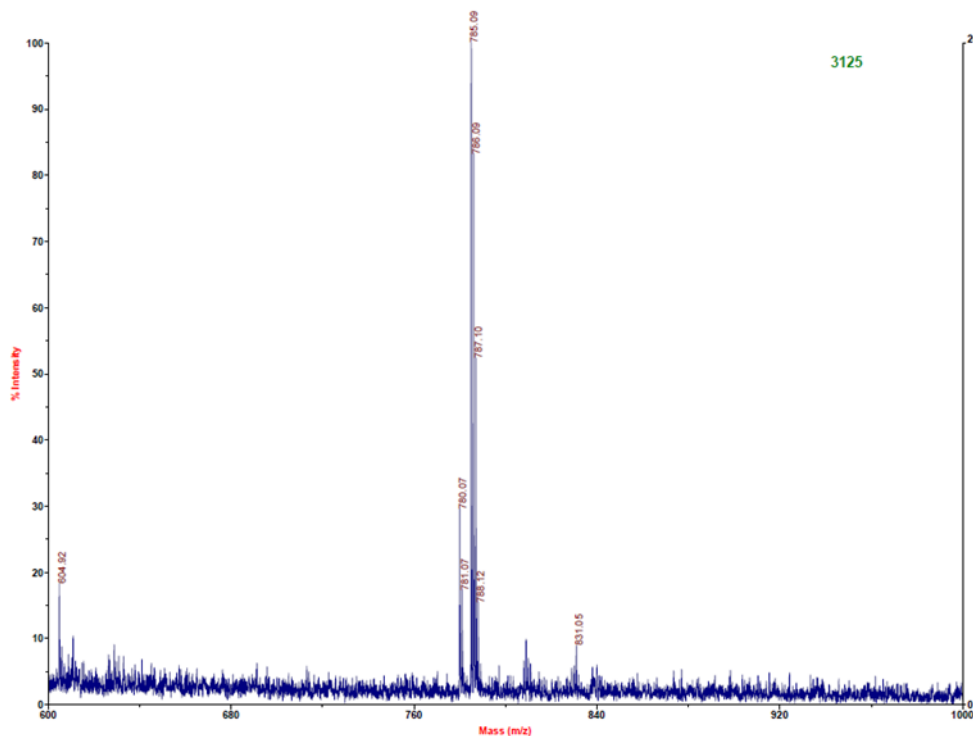

|                         |                               |
|-------------------------|-------------------------------|
| Mode of operation:      | Reflector                     |
| Extraction mode:        | Delayed                       |
| Polarity:               | Negative                      |
| Acquisition control:    | Manual                        |
| Accelerating voltage:   | 20000 V                       |
| Grid voltage:           | 74%                           |
| Mirror voltage ratio:   | 1.12                          |
| Guide wire 0:           | 0.001%                        |
| Extraction delay time:  | 300 nsec                      |
| Acquisition mass range: | 200 – 3000 Da                 |
| Number of laser shots:  | 200/spectrum                  |
| Laser intensity:        | 2752                          |
| Laser Rep Rate:         | 3.0 Hz                        |
| Calibration type:       | a1                            |
| Calibration matrix:     | a-Cyano-4-hydroxycinnamic aci |
| Low mass gate:          | 190 Da                        |
| Timed ion selector:     | Off                           |
| Digitizer start time:   | 14.39                         |
| Bin size:               | 0.5 nsec                      |
| Number of data points:  | 81987                         |
| Vertical scale 0:       | 500 mV                        |
| Vertical offset:        | 0%                            |
| Input bandwidth 0:      | 500 MHz                       |
| Sample well:            | 12                            |
| Plate ID:               | PLATE 2                       |
| Serial number:          | 6214                          |
| Instrument name:        | Voyager-DE PRO                |
| Plate type filename:    | C:\Voyager\100 well plate.plt |
| Lab name:               | Laboratorio de Masas          |
| Absolute x-position:    | 6688.89                       |
| Absolute y-position:    | 42426.1                       |
| Relative x-position:    | 21.394                        |
| Relative y-position:    | 198.646                       |
| Shots in spectrum:      | 600                           |
| Source pressure:        | 5.21e-007                     |
| Mirror pressure:        | 1.006e-007                    |
| TC2 pressure:           | 0.01045                       |
| TIS gate width:         | 5                             |
| TIS flight length:      | 693                           |

Acquired: 12:54:00, May 19, 2017

C:\SERVICIO\_MSI\Muestras\ROCA\_78\2017\MALDI\05\_May\ICTAN\JMiguel\_Mancheno\3125\_alphaREF\_110\_12\_0004.dat

Vale n° 1251

Printed: 14:08, May 19, 2017

**FIG S3.** Mass spectra of FAD. The yellow VprA protein was subjected to mass spectrometry analysis and the FAD flavin cofactor (785.09 Da) was identified.

Figure S4

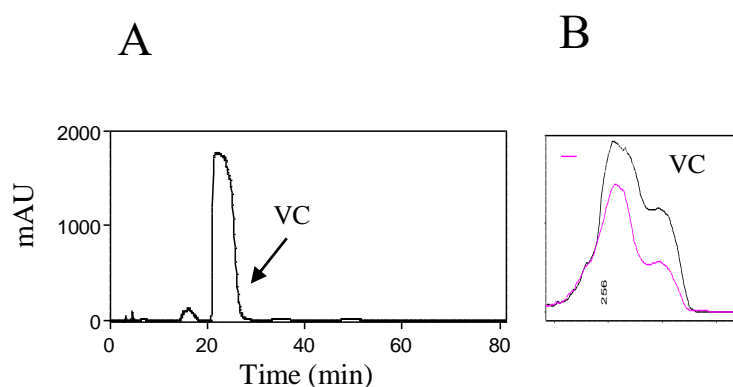

**FIG S4** Production of 4-vinylcatechol from *p*-coumaric acid. (A) Chromatograms of supernatants from *E. coli* cells bearing pURI3-*pdc* plasmid overexpressing the *pdc* gene from *L. plantarum* (Rodríguez et al., 2008. *J Agric Food Chem* 56:3068) grown in the presence of caffeic acid. Chromatogram was recorded at 280 nm. (B) Comparison between spectra of the compound produced and 4-vinylcatechol identified previously by LC-DAD/ESI-MS (Rodríguez et al., 2008. *J Agric Food Chem* 56:3068). The same *E. coli* strain was used previously to produce vinyl derivatives from alkaline hydrolysates of corn cobs (Salgado et al., 2012. *Bioresource Technol* 117:274-285; Salgado et al., 2014. *Enz Microb Technol* 58-59, 22-28).

Figure S5

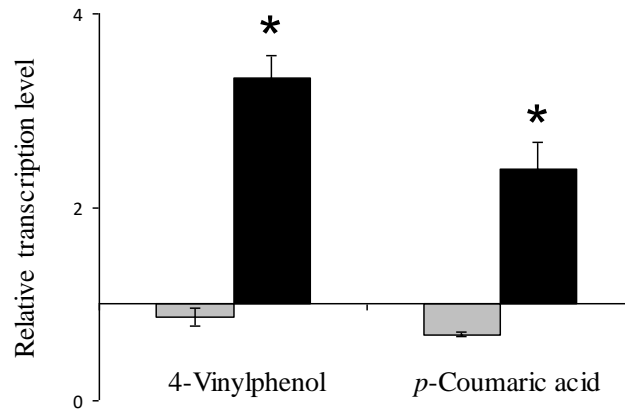

**FIG S5** Relative transcriptional expression of *vpr* genes in *L. plantarum* WCFS1 in response to the presence of two hydroxycinnamic derivatives, 4-vinylphenol and *p*-coumaric acid. *L. plantarum* cultures were exposed during 10 min at 1.5 mM of 4-vinylphenol or *p*-coumaric acid. Expression levels were calculated with the 7500 Fast System relative quantification software using *L. plantarum ldh* gene as endogenous gene and the growth in the absence of phenolic compound as growth condition calibrator. Expression level of *vprR* and *vprA* genes are represented by grey or black colour bars, respectively. The experiments were done in triplicate. The mean value and the standard error are shown. Asteriks indicate a *p* value <0.1.

Figure S6

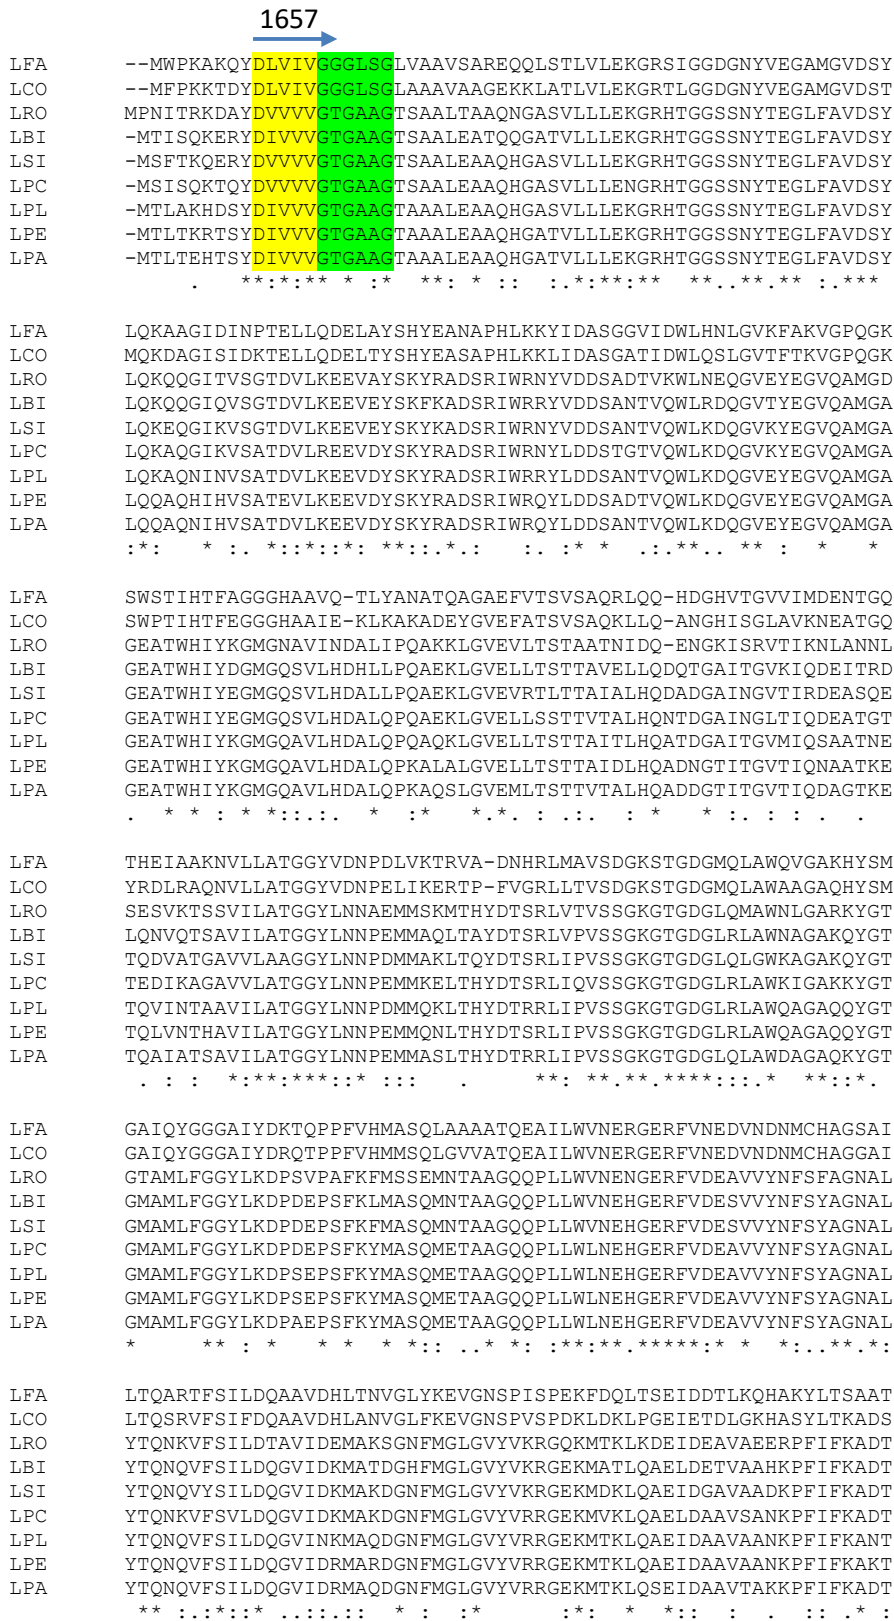

Supplement: zam017188694s1.pdf [file zam017188694s1.pdf]
